# Supplementary material for: Identifying long-term survivors and those at higher or lower risk of relapse among patients with cytogenetically normal acute myeloid leukemia using a high-dimensional mixture cure model
Source: Springer Nature journal article supplement (doi:10.1186/s13045-024-01553-6), 2024-05-03

**Supplementary Figure 1. RFS by 2022 ELN genetic-risk group and cure status for the test set.** A) Kaplan-Meier curve for relapse-free survival for 2022 ELN Favorable risk patients in the test set stratified by those predicted to be cured versus susceptible using the semi-parametric penalized MCM. B) Kaplan-Meier curve for relapse-free survival for 2022 ELN Intermediate risk patients in the test set stratified by those predicted to be cured versus susceptible using the semi-parametric penalized MCM. C) Kaplan-Meier curve for relapse-free survival for 2022 ELN Adverse risk patients in the test set stratified by those predicted to be cured versus susceptible using the semi-parametric penalized MCM. .

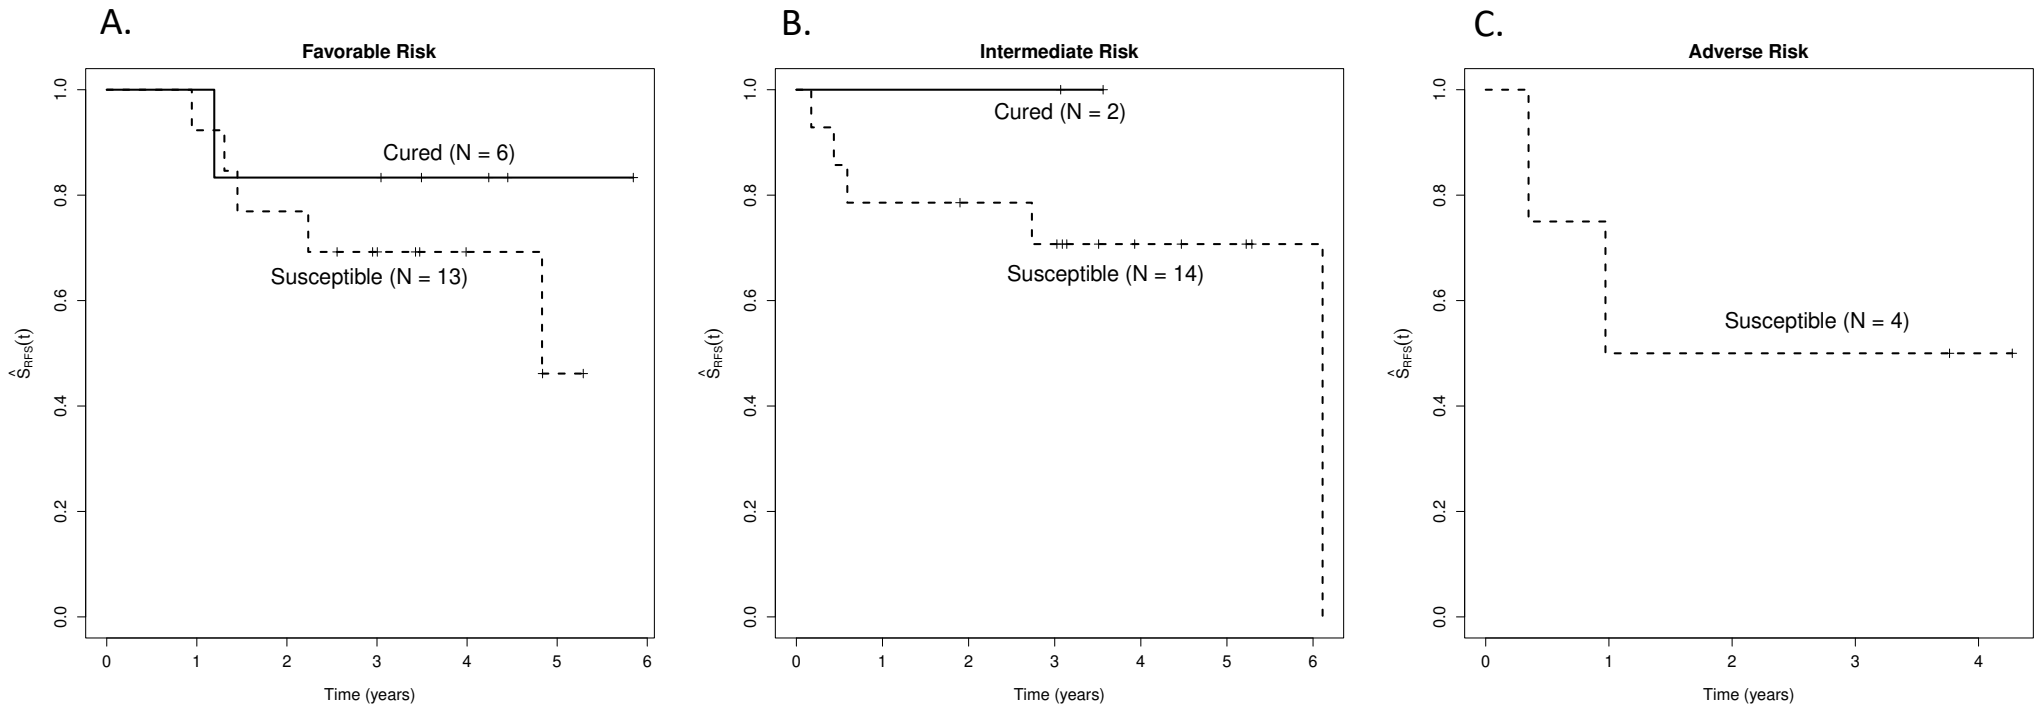

**Supplementary Figure 2. RFS by 2022 ELN genetic-risk group among susceptibles in the test set.** A) Kaplan-Meier curve for relapse-free survival for 2022 ELN Favorable risk patients predicted to be susceptible in the test set using the semi-parametric penalized MCM, stratified by high versus low risk of relapse. B) Kaplan-Meier curve for relapse-free survival for 2022 ELN Intermediate risk patients predicted to be susceptible in the test set using the semi-parametric penalized MCM, stratified by high versus low risk of relapse. C) Kaplan-Meier curve for relapse-free survival for 2022 ELN Adverse risk patients predicted to be susceptible in the test set using the semi-parametric penalized MCM, stratified by high versus low risk of relapse.

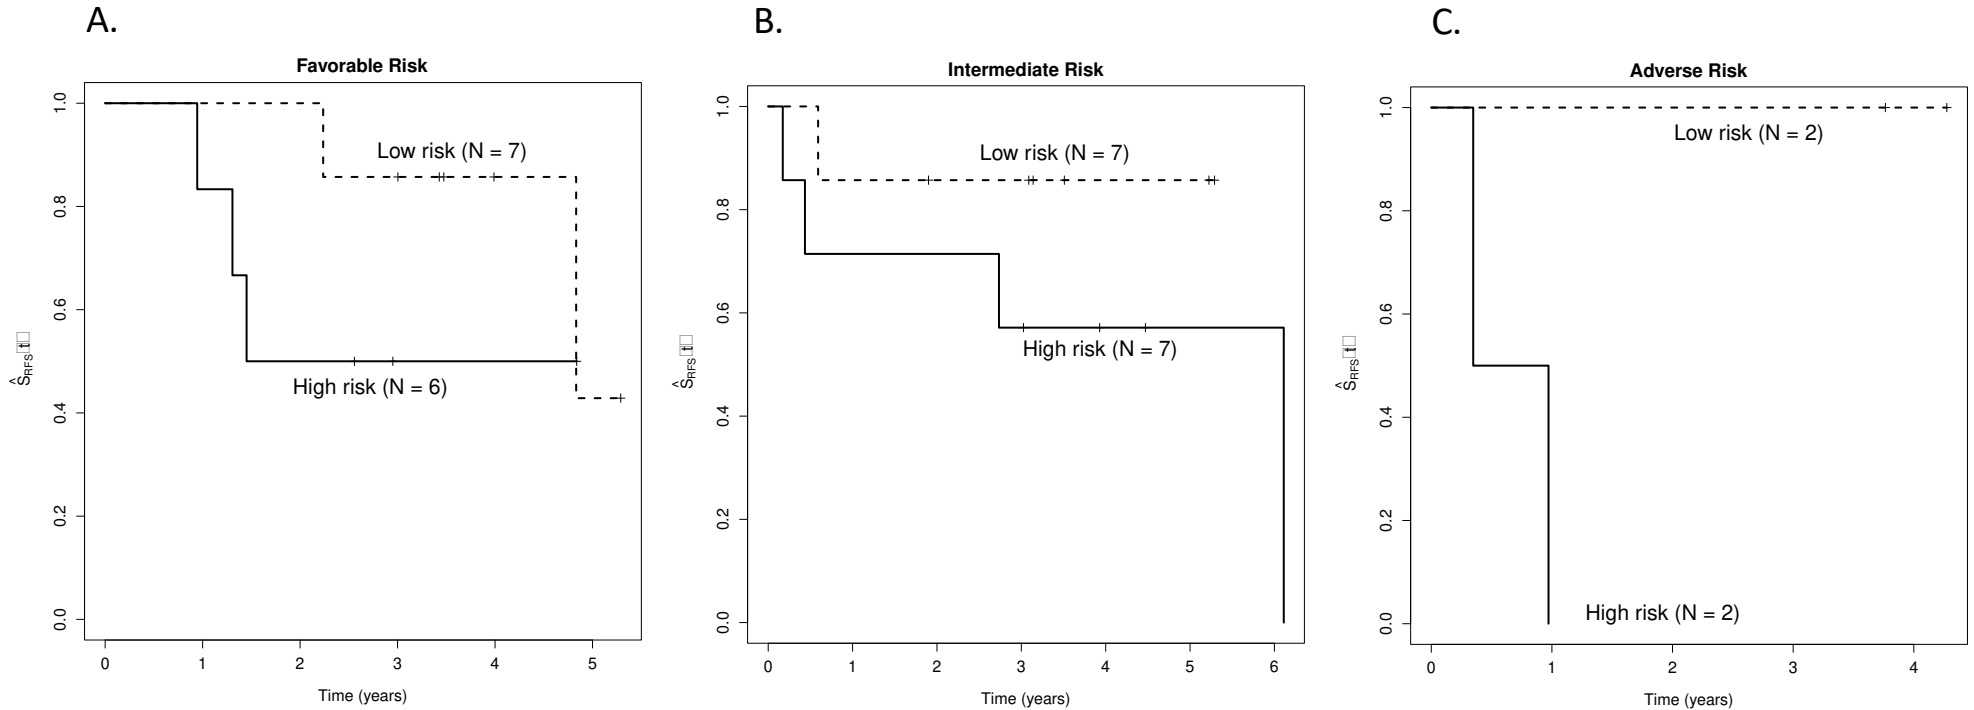

**Supplementary Figure 3.** A) Kaplan-Meier curve for relapse-free survival for the training set stratified by those predicted to be cured versus susceptible using the semi-parametric penalized MCM among those with *NPM1* mutant. B) Kaplan-Meier curve for relapse-free survival for those predicted to be susceptible in the training set stratified by high versus low risk of relapse using the semi-parametric penalized MCM among those with *NPM1* mutant.

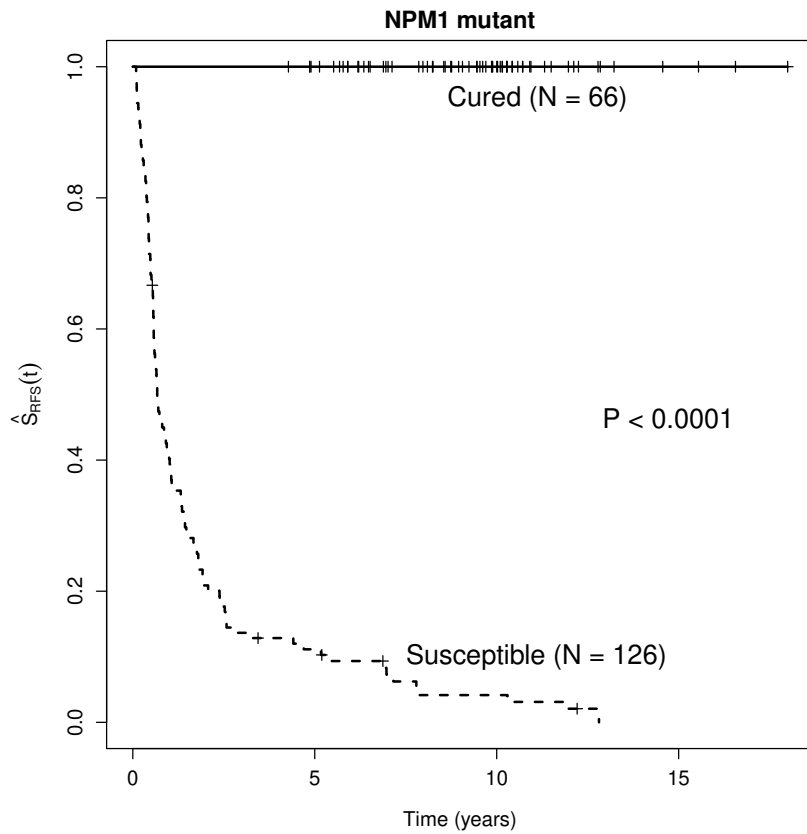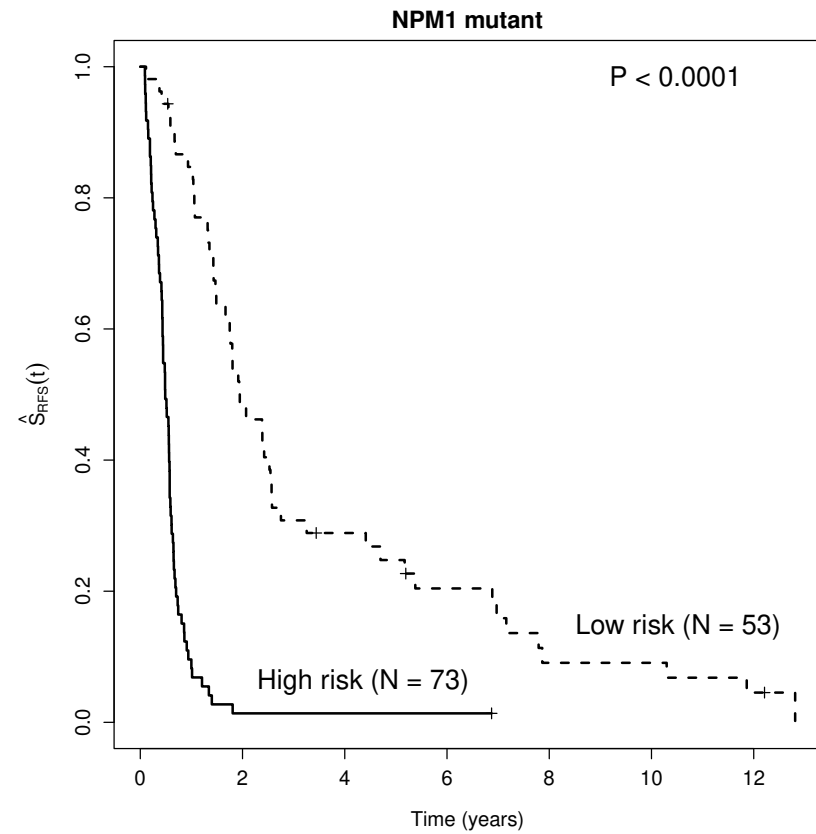

**Supplementary Figure 4.** A) Kaplan-Meier curve for relapse-free survival for the training set stratified by those predicted to be cured versus susceptible using the semi-parametric penalized MCM among those with  $CEBPA^{bzip}$ . B) Kaplan-Meier curve for relapse-free survival for those predicted to be susceptible in the training set stratified by high versus low risk of relapse using the semi-parametric penalized MCM among those with  $CEBPA^{bzip}$ .

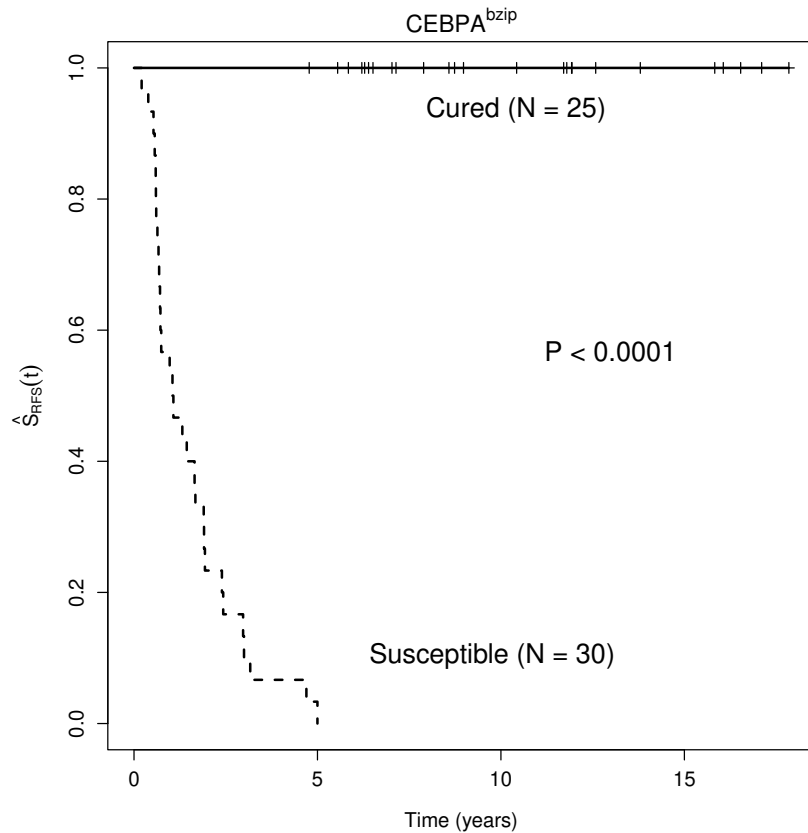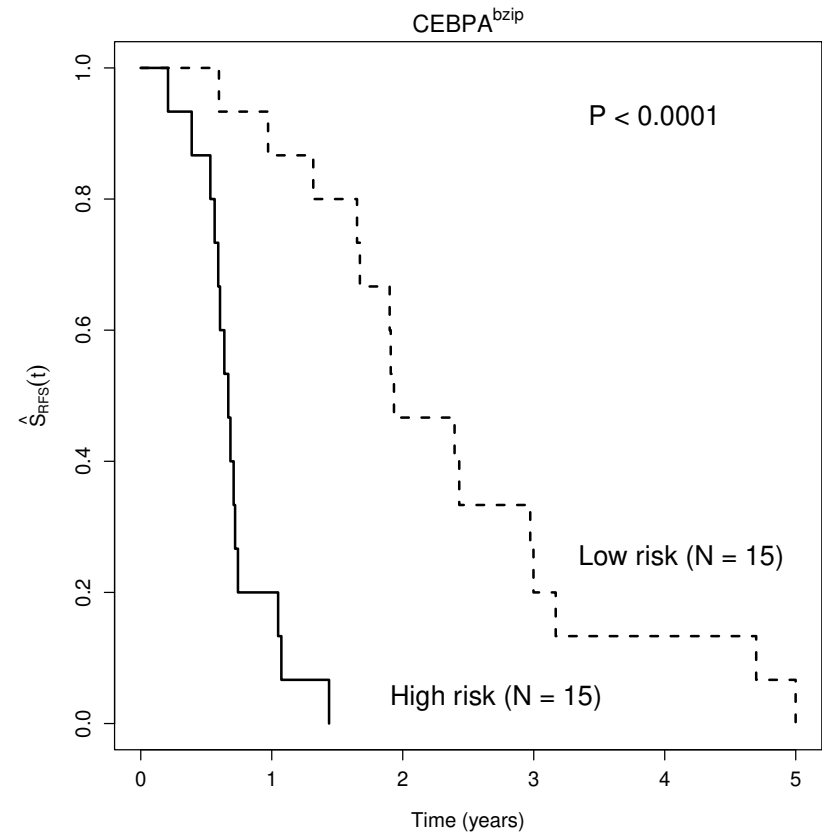

**Supplementary Figure 5.** A) Kaplan-Meier curve for relapse-free survival for the training set stratified by those predicted to be cured versus susceptible using the semi-parametric penalized MCM among those with *DNMT3A* mutant. B) Kaplan-Meier curve for relapse-free survival for those predicted to be susceptible in the training set stratified by high versus low risk of relapse using the semi-parametric penalized MCM among those with *DNMT3A* mutant.

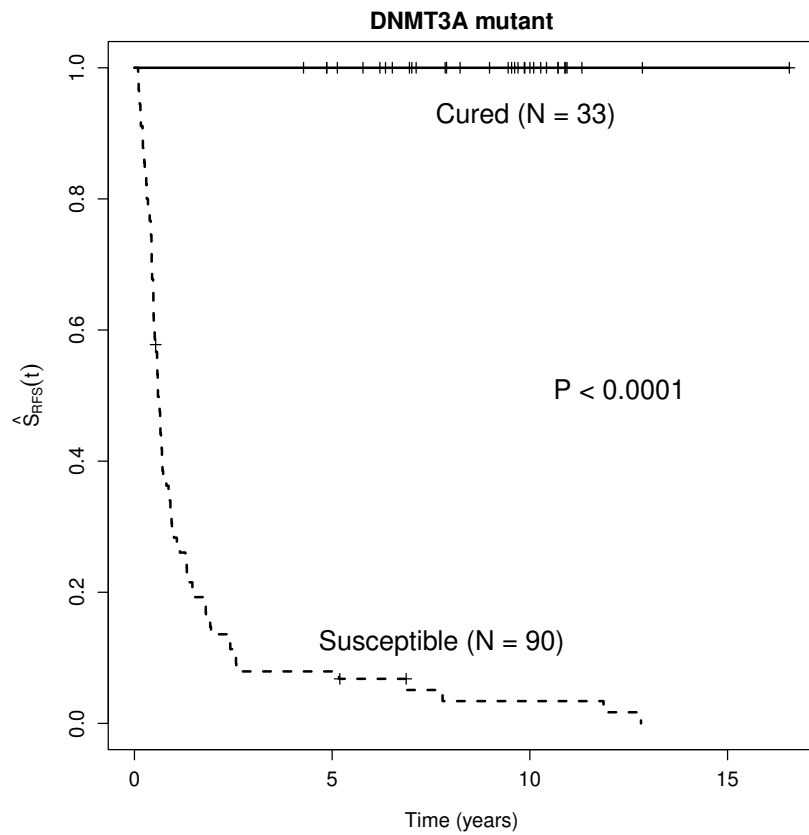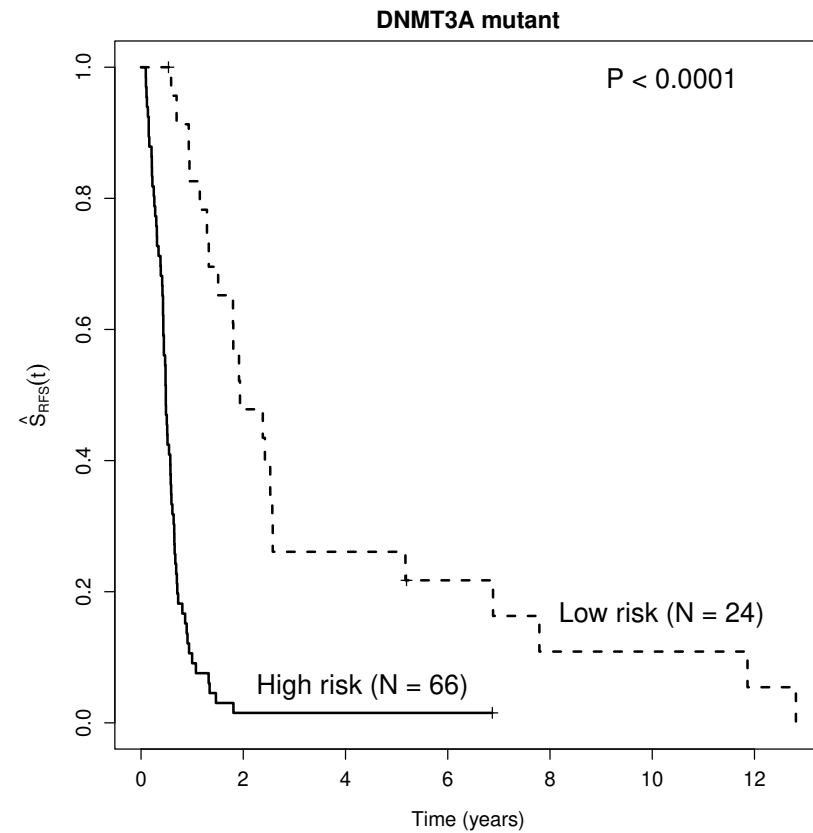

**Supplementary Figure 6.** A) Kaplan-Meier curve for relapse-free survival for the training set stratified by those predicted to be cured versus susceptible using the semi-parametric penalized MCM among those with *FLT3*-ITD. B) Kaplan-Meier curve for relapse-free survival for those predicted to be susceptible in the training set stratified by high versus low risk of relapse using the semi-parametric penalized MCM among those with *FLT3*-ITD.

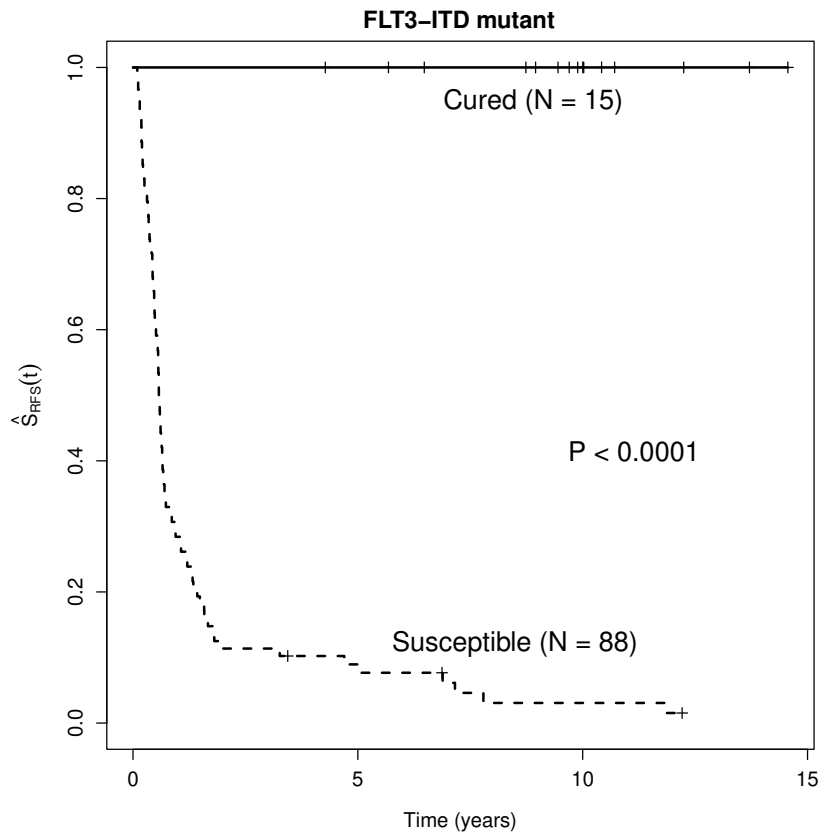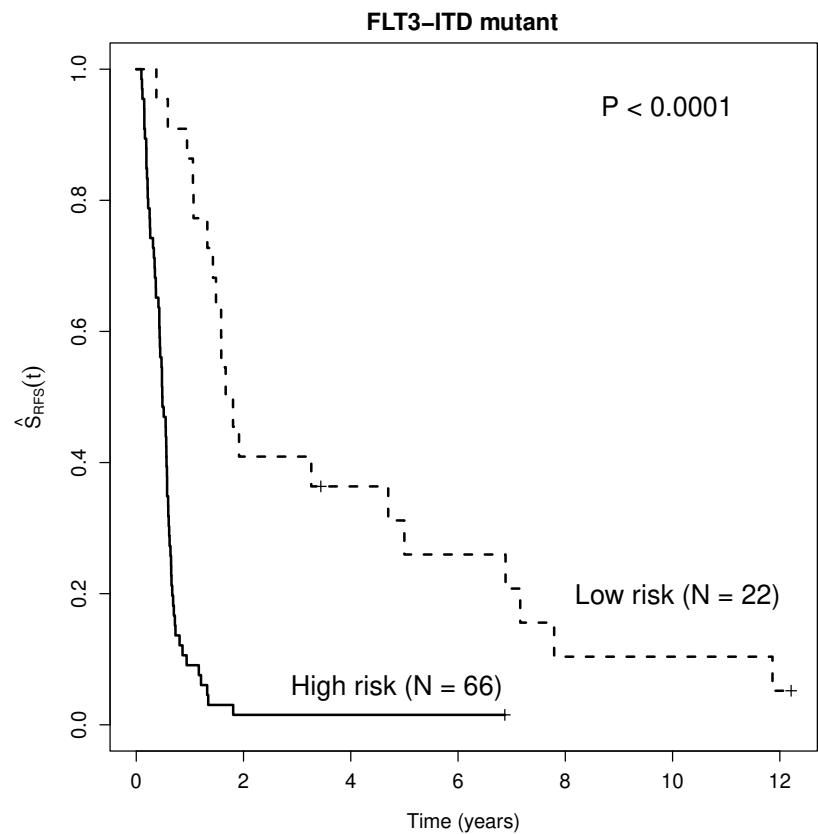

**Supplementary Figure 7.** A) Kaplan-Meier curve for relapse-free survival for the training set stratified by those predicted to be cured versus susceptible using the semi-parametric penalized MCM among those with *FLT3*-TKD. B) Kaplan-Meier curve for relapse-free survival for those predicted to be susceptible in the training set stratified by high versus low risk of relapse using the semi-parametric penalized MCM among those with *FLT3*-TKD.

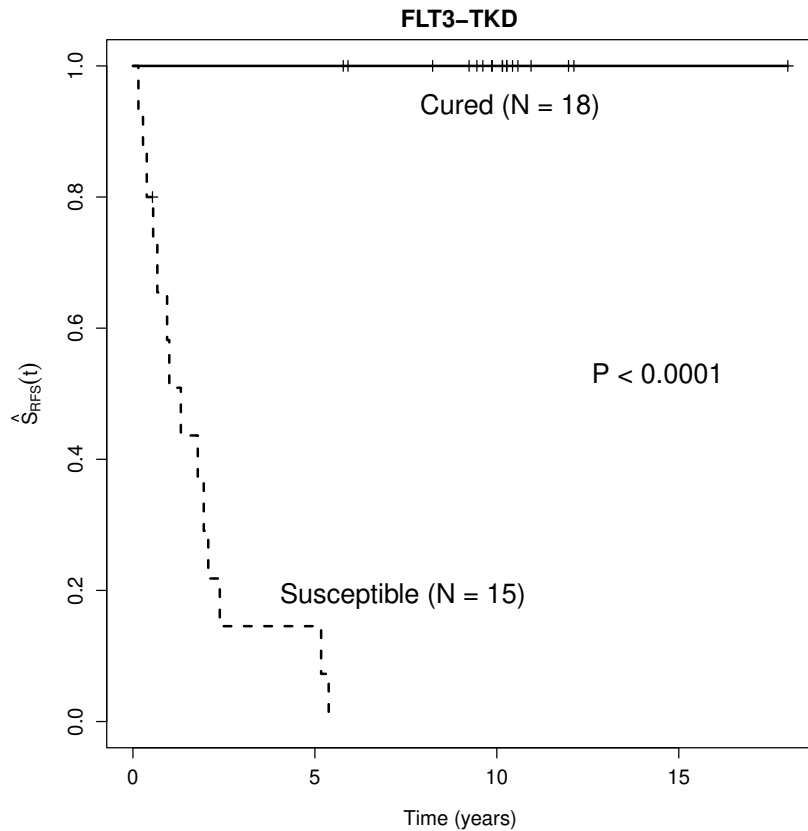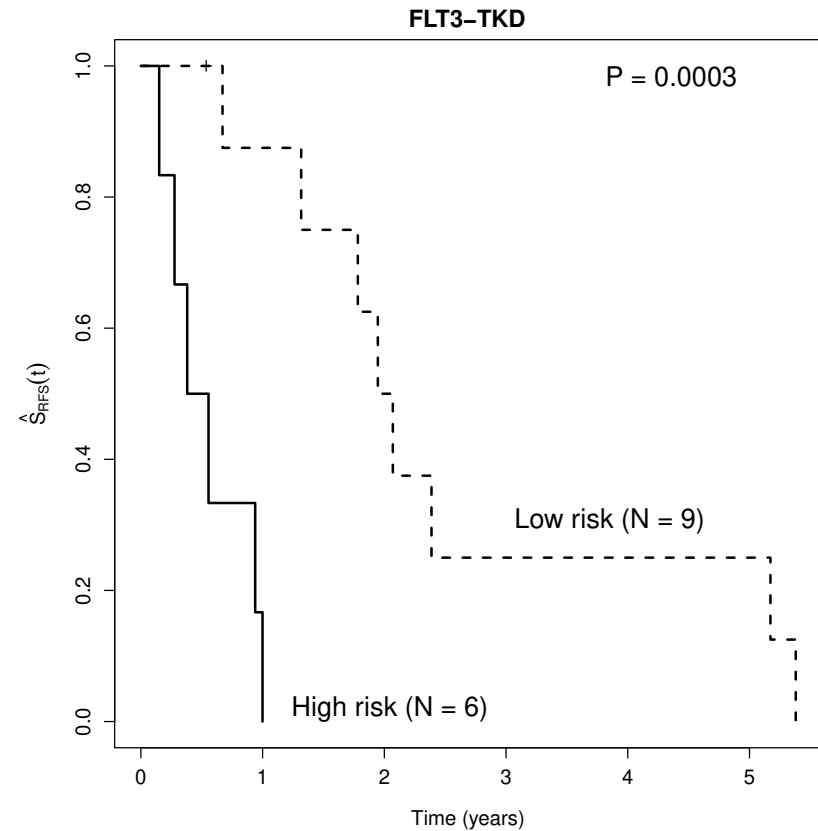

**Supplementary Figure 8.** A) Kaplan-Meier curve for relapse-free survival for the training set stratified by those predicted to be cured versus susceptible using the semi-parametric penalized MCM among those with *IDH1* mutant. B) Kaplan-Meier curve for relapse-free survival for those predicted to be susceptible in the training set stratified by high versus low risk of relapse using the semi-parametric penalized MCM among those with *IDH1* mutant.

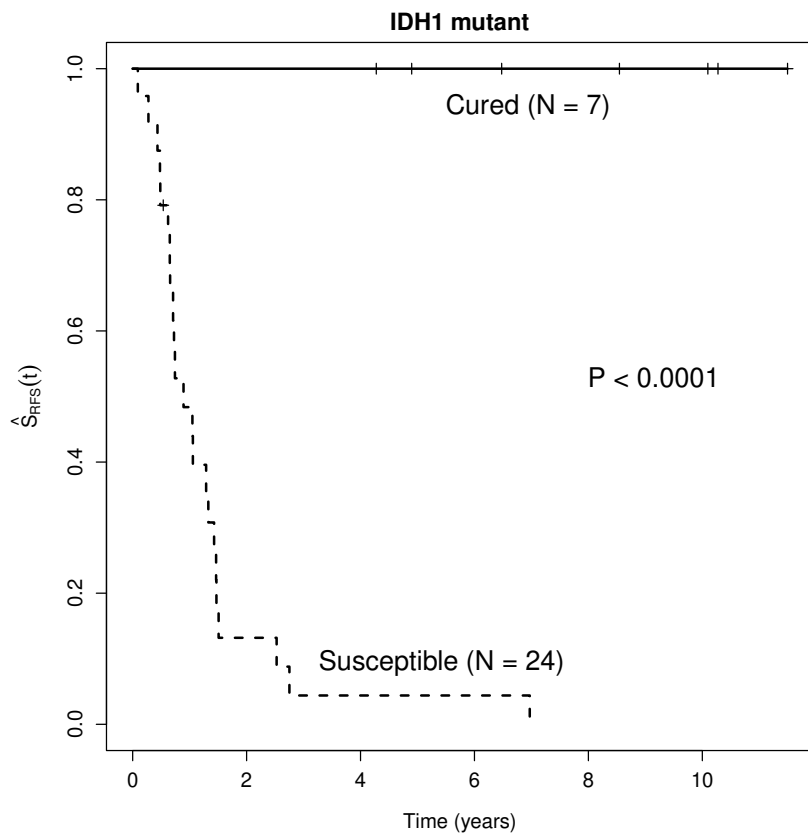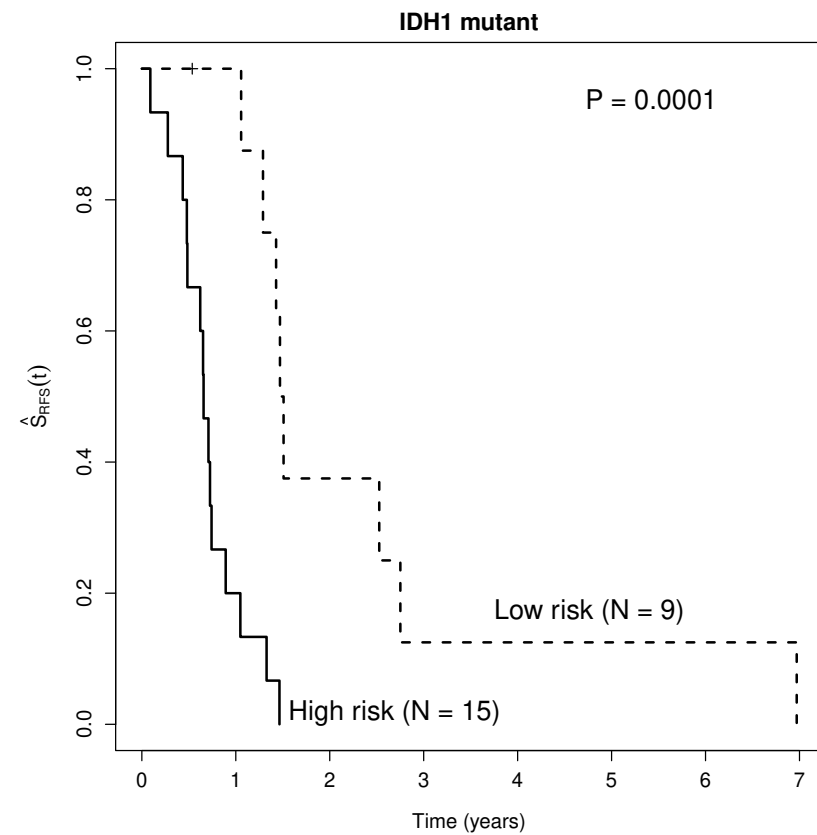



**Supplementary Figure 9.** A) Kaplan-Meier curve for relapse-free survival for the training set stratified by those predicted to be cured versus susceptible using the semi-parametric penalized MCM among those with *IDH2* mutant. B) Kaplan-Meier curve for relapse-free survival for those predicted to be susceptible in the training set stratified by high versus low risk of relapse using the semi-parametric penalized MCM among those with *IDH2* mutant.

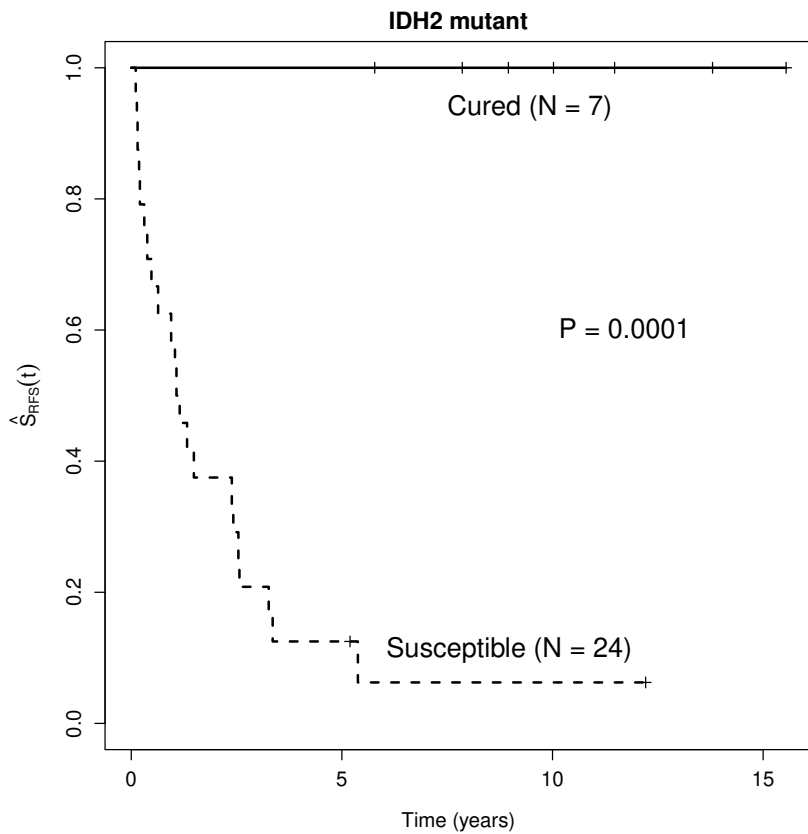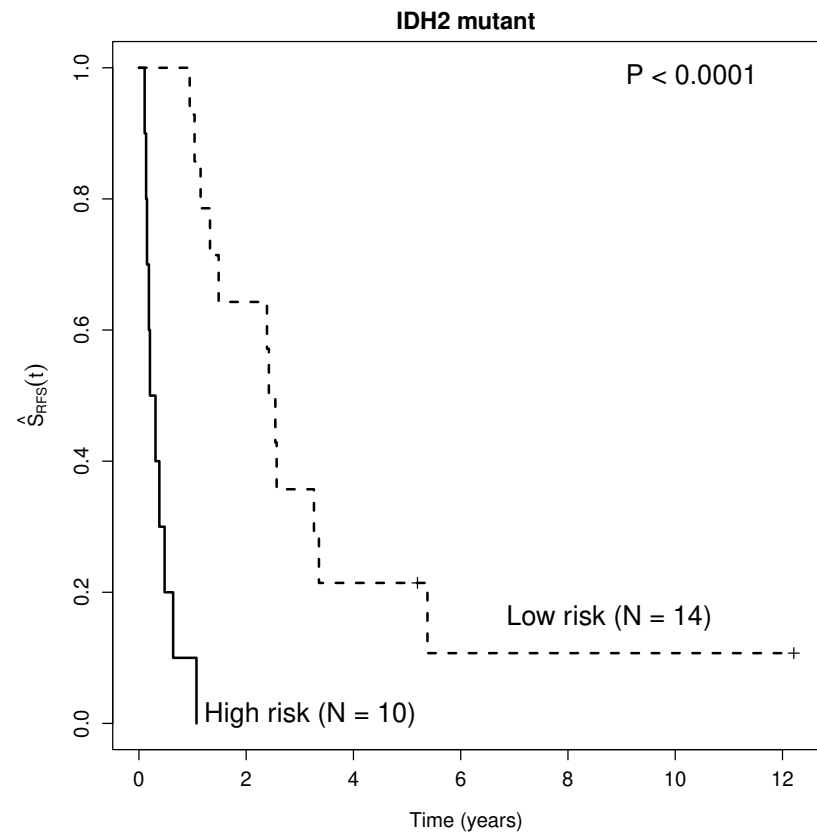

**Supplementary Figure 10.** A) Kaplan-Meier curve for relapse-free survival for the training set stratified by those predicted to be cured versus susceptible using the semi-parametric penalized MCM among those with *NRAS* mutant. B) Kaplan-Meier curve for relapse-free survival for those predicted to be susceptible in the training set stratified by high versus low risk of relapse using the semi-parametric penalized MCM among those with *NRAS* mutant.

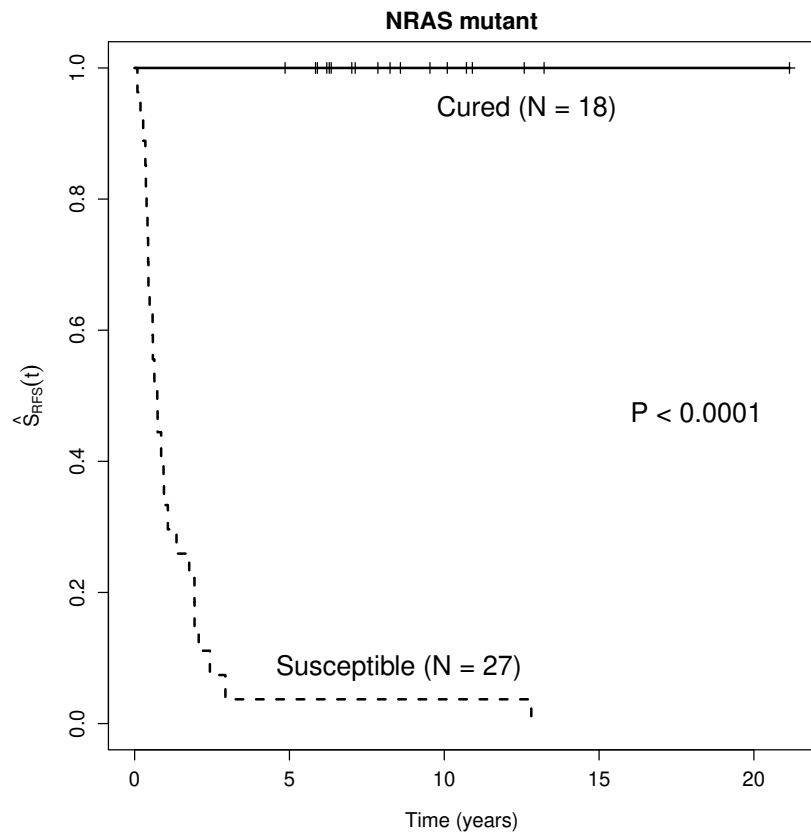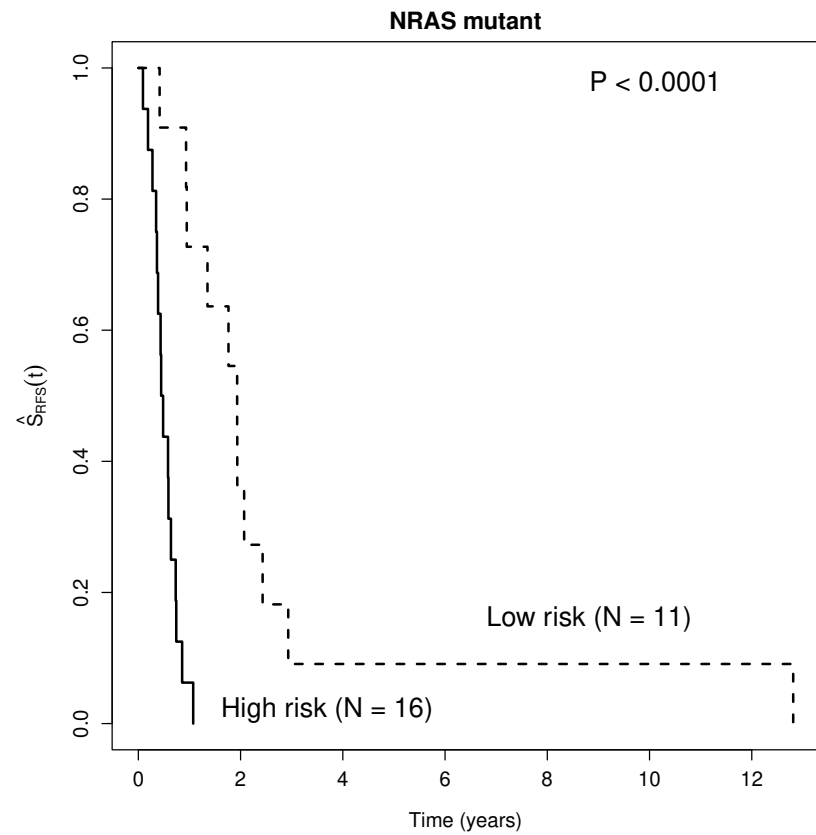

**Supplementary Figure 11.** A) Kaplan-Meier curve for relapse-free survival for the training set stratified by those predicted to be cured versus susceptible using the semi-parametric penalized MCM among those with *PTPN11* mutant. B) Kaplan-Meier curve for relapse-free survival for those predicted to be susceptible in the training set stratified by high versus low risk of relapse using the semi-parametric penalized MCM among those with biallelic *PTPN11* mutant.

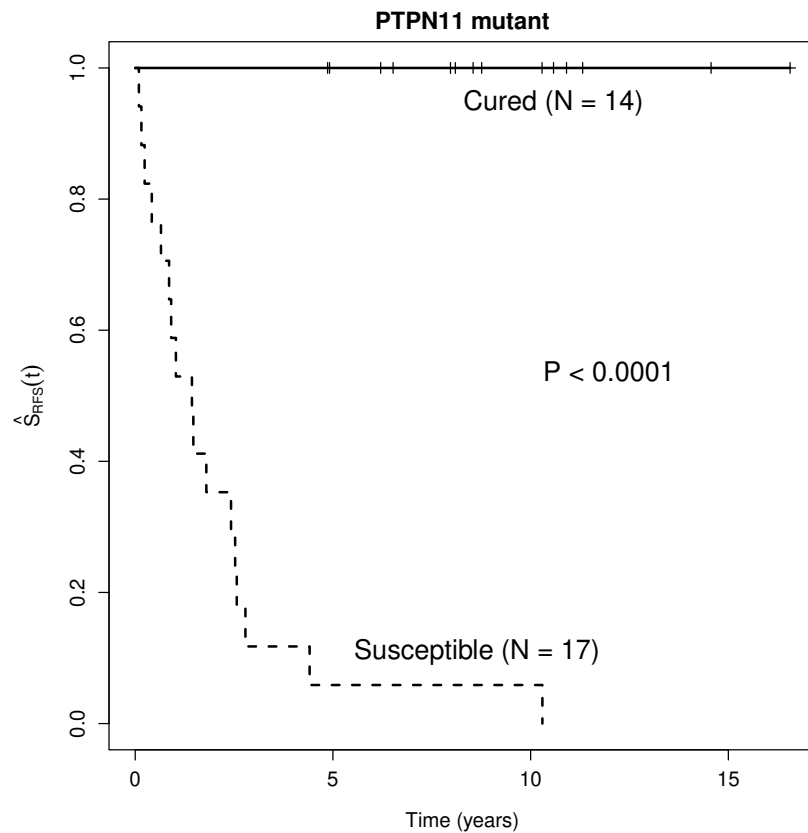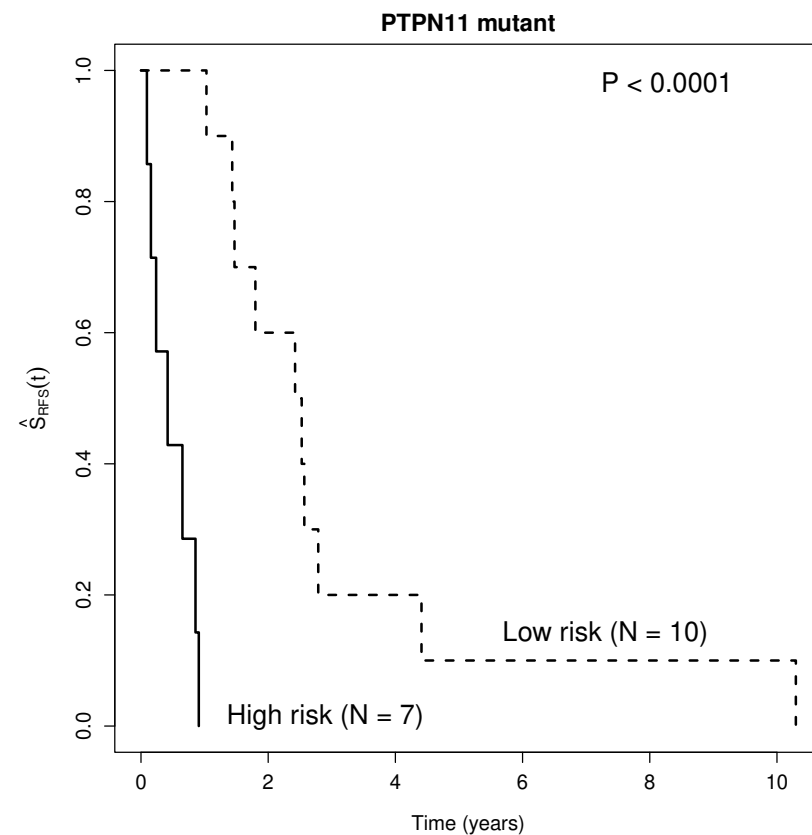

Supplement: MOESM2 [file 27050220]
