# Supplementary material for: Identifying long-term survivors and those at higher or lower risk of relapse among patients with cytogenetically normal acute myeloid leukemia using a high-dimensional mixture cure model
Source: Springer Nature journal article supplement (doi:10.1186/s13045-024-01553-6), 2024-05-03
Supplement: MOESM1 [file 27050220]

## SUPPLEMENTARY TABLES

**Supplementary Table 1.** Genes included in the incidence portion of the penalized MCM, sorted by the absolute size of their coefficient estimate

| ENSEMBL         | SYMBOL        | MAP      | Coefficient estimate |
|-----------------|---------------|----------|----------------------|
| ENSG00000196565 | HBG2          | 11p15.4  | -0.430561998         |
| ENSG00000023171 | GRAMD1B       | 11q24.1  | 0.429745891          |
| ENSG00000225138 | SLC9A3-AS1    | 5p15.33  | 0.394884275          |
| ENSG00000174130 | TLR6          | 4p14     | -0.377969596         |
| ENSG00000197937 | ZNF347        | 19q13.42 | -0.370950961         |
| ENSG00000110237 | ARHGEF17      | 11q13.4  | 0.353799918          |
| ENSG00000113504 | SLC12A7       | 5p15.33  | 0.349618786          |
| ENSG00000171813 | PWWP2B        | 10q26.3  | -0.339856086         |
| ENSG00000180902 | D2HGDH        | 2q37.3   | -0.337672361         |
| ENSG00000270562 | FOXP1-DT      | 3p13     | 0.326274282          |
| ENSG00000185986 | SDHAP3        | 5p15.33  | 0.310628397          |
| ENSG00000116574 | RHOA          | 1q42.13  | 0.310061984          |
| ENSG00000119280 | C1orf198      | 1q42.2   | -0.306114339         |
| ENSG00000157107 | FCHO2         | 5q13.2   | -0.303693144         |
| ENSG00000100299 | ARSA          | 22q13.33 | 0.293641811          |
| ENSG00000162433 | AK4           | 1p31.3   | 0.290052543          |
| ENSG00000167291 | TBC1D16       | 17q25.3  | 0.288430631          |
| ENSG00000139318 | DUSP6         | 12q21.33 | 0.286192825          |
| ENSG00000187653 | TMSB4XP8      | 4q22.1   | -0.276361818         |
| ENSG00000129824 | RPS4Y1        | Yp11.2   | 0.266395498          |
| ENSG00000227615 | lnc-C5orf49-1 | 5p15.31  | -0.260547237         |
| ENSG00000174080 | CTSF          | 11q13.2  | -0.260345979         |
| ENSG00000170909 | OSCAR         | 19q13.42 | -0.259063694         |
| ENSG00000186854 | TRABD2A       | 2p11.2   | -0.253207202         |
| ENSG00000061918 | GUCY1B1       | 4q32.1   | 0.251178488          |
| ENSG00000187010 | RHD           | 1p36.11  | -0.241462682         |
| ENSG00000115183 | TANC1         | 2q24.2   | 0.232030292          |
| ENSG00000237892 | KLF7-IT1      | 2q33.3   | -0.226363805         |
| ENSG00000188002 | PDCD6P1       | 5p15.33  | 0.221977176          |
| ENSG00000120594 | PLXDC2        | 10p12.31 | -0.221747871         |
| ENSG00000233927 | RPS28         | 19p13.2  | 0.2182802            |
| ENSG00000104689 | TNFRSF10A     | 8p21.3   | -0.215493542         |
| ENSG00000135916 | ITM2C         | 2q37.1   | 0.214559913          |
| ENSG00000151208 | DLG5          | 10q22.3  | -0.207482323         |
| ENSG00000110076 | NRXN2         | 11q13.1  | 0.204226346          |
| ENSG00000188636 | RTL6          | 22q13.31 | -0.202166865         |
| ENSG00000273033 | LINC02035     | 3q21.1   | -0.199670391         |

## SUPPLEMENTARY TABLES

| ENSEMBL         | SYMBOL        | MAP      | Coefficient estimate |
|-----------------|---------------|----------|----------------------|
| ENSG00000205571 | SMN1          | 5q13.2   | -0.172065003         |
| ENSG00000213967 | ZNF726        | 19p12    | 0.168996404          |
| ENSG00000008283 | CYB561        | 17q23.3  | 0.166082461          |
| ENSG00000069020 | MAST4         | 5q12.3   | 0.163413426          |
| ENSG00000114737 | CISH          | 3p21.2   | 0.156419357          |
| ENSG00000163412 | EIF4E3        | 3p13     | 0.156175094          |
| ENSG00000188856 | RPSAP47       | 8q21.13  | 0.151046981          |
| ENSG00000138722 | MMRN1         | 4q22.1   | 0.150942306          |
| ENSG00000013725 | CD6           | 11q12.2  | -0.150604238         |
| ENSG00000169203 | NPIPB12       | 16p11.2  | -0.147628971         |
| ENSG00000072422 | RHOBTB1       | 10q21.2  | -0.139984836         |
| ENSG00000102409 | BEX4          | Xq22.1   | -0.139172758         |
| ENSG00000171222 | SCAND1        | 20q11.23 | -0.137726519         |
| ENSG00000133401 | PDZD2         | 5p13.3   | 0.137402276          |
| ENSG00000124882 | EREG          | 4q13.3   | 0.133316677          |
| ENSG00000187627 | RGPD1         | 2p11.2   | 0.129229778          |
| ENSG00000150782 | IL18          | 11q23.1  | 0.122336099          |
| ENSG00000115525 | ST3GAL5       | 2p11.2   | 0.119416483          |
| ENSG00000226471 | lnc-CCDC117-1 | 22q12.1  | 0.118535255          |
| ENSG00000106526 | ACTR3C        | 7q36.1   | -0.118278227         |
| ENSG00000156381 | ANKRD9        | 14q32.31 | -0.117696098         |
| ENSG00000100596 | SPTLC2        | 14q24.3  | -0.113051469         |
| ENSG00000168939 | SPRY3         | Xq28     | -0.112379482         |
| ENSG00000250251 | PKD1P6        | 16p13.11 | -0.112093048         |
| ENSG00000197561 | ELANE         | 19p13.3  | 0.11133613           |
| ENSG00000090975 | PITPNM2       | 12q24.31 | -0.110561164         |
| ENSG00000058056 | USP13         | 3q26.33  | -0.109812651         |
| ENSG00000123080 | CDKN2C        | 1p32.3   | -0.103617481         |
| ENSG00000260727 | SLC7A5P1      | 16p11.2  | -0.102057577         |
| ENSG00000100916 | BRMS1L        | 14q13.2  | -0.09951764          |
| ENSG00000111275 | ALDH2         | 12q24.12 | 0.096757729          |
| ENSG00000238160 | LINC02863     | 5q31.1   | 0.094861526          |
| ENSG00000237298 | TTN-AS1       | 2q31.2   | -0.093030226         |
| ENSG00000153563 | CD8A          | 2p11.2   | -0.09250286          |
| ENSG00000080823 | MOK           | 14q32.31 | 0.091887433          |
| ENSG00000001561 | ENPP4         | 6p21.1   | -0.087311244         |
| ENSG00000144647 | POMGNT2       | 3p22.1   | -0.085952923         |
| ENSG00000152767 | FARP1         | 13q32.2  | 0.085703253          |
| ENSG00000244405 | ETV5          | 3q27.2   | -0.084042931         |
| ENSG00000121274 | TENT4B        | 16q12.1  | -0.083872651         |

## SUPPLEMENTARY TABLES

| ENSEMBL         | SYMBOL            | MAP      | Coefficient estimate |
|-----------------|-------------------|----------|----------------------|
| ENSG00000175265 | GOLGA8A           | 15q14    | 0.082845902          |
| ENSG00000236876 | TMSB4XP1          | 1p34.2   | -0.08135629          |
| ENSG00000271646 | IRF2-DT           | 4q35.1   | 0.080288763          |
| ENSG00000247627 | MTND4P12          | 5q31.1   | -0.079562269         |
| ENSG00000170456 | DENND5B           | 12p11.21 | -0.077641624         |
| ENSG00000100376 | FAM118A           | 22q13.31 | 0.076055753          |
| ENSG00000214425 | LRR37A4P          | 17q21.31 | -0.076040705         |
| ENSG00000007062 | PROM1             | 4p15.32  | 0.069657787          |
| ENSG00000049192 | ADAMTS6           | 5q12.3   | -0.063941645         |
| ENSG00000259276 | HSALNT0382748     | 15q25.3  | 0.057791547          |
| ENSG00000106780 | MEGF9             | 9q33.2   | -0.047079761         |
| ENSG00000145476 | CYP4V2            | q35.2    | -0.046914218         |
| ENSG00000060138 | YBX3              | 12p13.2  | 0.04614826           |
| ENSG00000170035 | UBE2E3            | 2q31.3   | -0.046083115         |
| ENSG00000132819 | RBM38             | 20q13.31 | -0.046009468         |
| ENSG00000132122 | SPATA6            | 1p33     | -0.042365658         |
| ENSG00000234883 | MIR155HG          | 21q21.3  | 0.040561418          |
| ENSG00000107957 | SH3PXD2A          | 10q24.33 | -0.038625494         |
| ENSG00000130702 | LAMA5             | 20q13.33 | -0.033321365         |
| ENSG00000233974 | POM121 pseudogene | 5p14.3   | -0.032612698         |
| ENSG00000264895 | HSALNG0145324     | 17q21.33 | -0.027950985         |
| ENSG00000182871 | COL18A1           | 21q22.3  | -0.027394183         |
| ENSG00000068489 | PRR11             | 17q22    | -0.026359848         |
| ENSG00000110799 | VWF               | 12p13.31 | 0.026154387          |
| ENSG00000147180 | ZNF711            | Xq21.1   | 0.026050318          |
| ENSG00000166435 | XRRA1             | 11q13.4  | -0.024337407         |
| ENSG00000223345 | H2BP1             | 1p11.2   | -0.020735752         |
| ENSG00000157240 | FZD1              | 7q21.13  | -0.014418459         |
| ENSG00000144677 | CTDSPL            | 3p22.2   | 0.011354679          |
| ENSG00000167851 | CD300A            | 17q25.1  | 0.009623768          |
| ENSG00000189223 | PAX8-AS1          | 2q14.1   | 0.00676482           |
| ENSG00000120675 | DNAJC15           | 13q14.11 | -0.005296614         |
| ENSG00000174059 | CD34              | 1q32.2   | 0.003554299          |
| ENSG00000229153 | EPHA1-AS1         | 7q35     | -0.000636884         |
| ENSG00000134531 | EMP1              | 12p13.1  | 0.000237136          |

## SUPPLEMENTARY TABLES

**Supplementary Table 2.** Genes included in the latency portion of the penalized MCM, sorted by the absolute size of their coefficient estimate

| ENSEMBL         | SYMBOL    | MAP       | Coefficient estimate |
|-----------------|-----------|-----------|----------------------|
| ENSG00000174059 | CD34      | 1q32.2    | 0.38890555           |
| ENSG00000173083 | HPSE      | 4q21.23   | -0.34084587          |
| ENSG00000273018 | FAM106A   | 17p11.2   | -0.305979777         |
| ENSG00000254415 | SIGLEC14  | 19q13.41  | -0.292543578         |
| ENSG00000071894 | CPSF1     | 8q24.3    | -0.278074177         |
| ENSG00000197253 | TPSB2     | 16p13.3   | -0.277988443         |
| ENSG00000168502 | MTCL1     | 18p11.22  | 0.261079608          |
| ENSG00000076555 | ACACB     | 12q24.11  | -0.228209685         |
| ENSG00000179630 | LACC1     | 13q14.11  | -0.225571164         |
| ENSG00000181104 | F2R       | 5q13.3    | 0.221809537          |
| ENSG00000117480 | FAAH      | 1p33      | 0.218580954          |
| ENSG00000173530 | TNFRSF10D | 8p21.3    | 0.210230749          |
| ENSG00000131188 | PRR7      | 5q35.3    | 0.209063364          |
| ENSG00000140287 | HDC       | 15q21.2   | -0.207754375         |
| ENSG00000149131 | SERPING1  | 11q12.1   | -0.192533729         |
| ENSG00000132849 | PATJ      | 1p31.3    | -0.1881949           |
| ENSG00000136997 | MYC       | 8q24.21   | 0.188085348          |
| ENSG00000196415 | PRTN3     | 19p13.3   | 0.178134316          |
| ENSG00000135362 | PRR5L     | 11p13-p12 | 0.174424911          |
| ENSG00000029639 | TFB1M     | 6q25.3    | 0.174393482          |
| ENSG00000241489 | B3KWA1    | Xq28      | 0.173229675          |
| ENSG00000213722 | DDAH2     | 6p21.33   | -0.173080816         |
| ENSG00000124882 | EREG      | 4q13.3    | 0.166567918          |
| ENSG00000127152 | BCL11B    | 14q32.2   | -0.158897988         |
| ENSG00000100448 | CTSG      | 14q12     | 0.157138941          |
| ENSG00000159788 | RGS12     | 4p16.3    | 0.156858263          |
| ENSG00000136193 | SCRN1     | 7p14.3    | 0.15170139           |
| ENSG00000229153 | EPHA1-AS1 | 7q35      | -0.144263562         |
| ENSG00000159403 | C1R       | 12p13.31  | 0.143339188          |
| ENSG00000175352 | NRIP3     | 11p15.4   | -0.142716001         |
| ENSG00000213906 | LTB4R2    | 14q12     | 0.141642333          |
| ENSG00000008405 | CRY1      | 12q23.3   | -0.131412539         |
| ENSG00000018189 | RUFY3     | 4q13.3    | -0.130426824         |
| ENSG00000167851 | CD300A    | 17q25.1   | 0.129639937          |
| ENSG00000124019 | FAM124B   | 2q36.2    | 0.128077973          |
| ENSG00000185986 | SDHAP3    | 5p15.33   | 0.126654694          |
| ENSG00000170180 | GYPA      | 4q31.21   | -0.124036206         |

## SUPPLEMENTARY TABLES

| ENSEMBL         | SYMBOL    | MAP      | Coefficient estimate |
|-----------------|-----------|----------|----------------------|
| ENSG00000204172 | AGAP9     | 10q11.22 | -0.121690607         |
| ENSG00000208772 | SNORD94   | 2p11.2   | 0.121682699          |
| ENSG00000166987 | MBD6      | 12q13.3  | 0.120165881          |
| ENSG00000197081 | IGF2R     | 6q25.3   | 0.11852073           |
| ENSG00000166435 | XRRA1     | 11q13.4  | -0.117591022         |
| ENSG00000227191 | TRGC2     | 7p14.1   | 0.113761037          |
| ENSG00000131370 | SH3BP5    | 3p25.1   | 0.113356178          |
| ENSG00000188636 | RTL6      | 22q13.31 | -0.111961905         |
| ENSG00000132530 | XAF1      | 17p13.1  | 0.106931602          |
| ENSG00000106546 | AHR       | 7p21.1   | 0.106767262          |
| ENSG00000200243 | RN7SKP79  | 5p15.31  | -0.098834878         |
| ENSG00000148444 | COMMD3    | 10p12.2  | 0.095382434          |
| ENSG00000180596 | H2BC4     | 6p22.2   | -0.094772903         |
| ENSG00000070404 | FSTL3     | 19p13.3  | 0.094291261          |
| ENSG00000205593 | DENND6B   | 22q13.33 | 0.090209897          |
| ENSG00000152778 | IFIT5     | 10q23.31 | 0.089023219          |
| ENSG00000185129 | PURA      | 5q31.3   | -0.088919446         |
| ENSG00000199347 | RNU5E-1   | 1p36.22  | 0.078872961          |
| ENSG00000163814 | CDCP1     | 3p21.31  | 0.077981334          |
| ENSG00000230076 | RPL10P6   | 2q35     | -0.075186255         |
| ENSG00000231721 | LINC-PINT | 7q32.3   | 0.071324547          |
| ENSG00000144036 | EXOC6B    | 2p13.2   | -0.070114731         |
| ENSG00000137193 | PIM1      | 6p21.2   | 0.067305593          |
| ENSG00000023909 | GCLM      | 1p22.1   | -0.062437159         |
| ENSG00000072422 | RHOBTB1   | 10q21.2  | -0.05986443          |
| ENSG00000201801 | RNU5E-4P  | 1p36.22  | 0.056169274          |
| ENSG00000185883 | ATP6VOC   | 16p13.3  | 0.049542986          |
| ENSG00000120913 | PDLIM2    | 8p21.3   | 0.047626731          |
| ENSG00000196565 | HBG2      | 11p15.4  | -0.044737899         |
| ENSG00000089723 | OTUB2     | 14q32.12 | 0.043260914          |
| ENSG00000214016 | RPSAP61   | Xp11.3   | -0.04225761          |
| ENSG00000151208 | DLG5      | 10q22.3  | -0.040464746         |
| ENSG00000261377 | PDCD6IPP2 | 15q13.1  | 0.035766321          |
| ENSG00000185710 | SMG1P4    | 16p12.2  | -0.031606669         |
| ENSG00000105808 | RASA4     | 7q22.1   | -0.031388851         |
| ENSG00000253276 | CCDC71L   | 7q22.3   | 0.02941447           |
| ENSG00000154217 | PITPNC1   | 17q24.2  | -0.023085786         |
| ENSG00000213626 | LBH       | 2p23.1   | -0.021526643         |
| ENSG00000022267 | FHL1      | Xq26.3   | 0.020973797          |
| ENSG00000196155 | PLEKHG4   | 16q22.1  | -0.017251314         |

## SUPPLEMENTARY TABLES

| <b>ENSEMBL</b>  | <b>SYMBOL</b> | <b>MAP</b> | <b>Coefficient estimate</b> |
|-----------------|---------------|------------|-----------------------------|
| ENSG00000223345 | H2BP1         | 1p11.2     | -0.015800561                |
| ENSG00000121039 | RDH10         | 8q21.11    | 0.0152843                   |
| ENSG00000188211 | NCR3LG1       | 11p15.1    | -0.01372034                 |
| ENSG00000213085 | CFAP45        | 1q23.2     | -0.01171965                 |
| ENSG00000135272 | MDFIC         | q31.2      | 0.005847174                 |
| ENSG00000253210 | DENND3-AS1    | 8q24.3     | 0.005781547                 |
| ENSG00000241529 | RB7SL767P     | 3q13.2     | -0.0042305                  |
| ENSG00000112773 | TENT5A        | 6q14.1     | 0.002917112                 |
| ENSG00000100418 | DESI1         | 22q13.2    | -0.002221063                |
| ENSG00000102409 | BEX4          | Xq22.1     | -0.001633697                |

## SUPPLEMENTARY TABLES

**Supplementary Table 3.** Genes included in both the incidence and latency portions of the penalized MCM, sorted by the maximum absolute size of their coefficient estimates

| <b>ENSEMBL</b>  | <b>SYMBOL</b> | <b>MAP</b> | <b>Incidence<br/>coefficient<br/>estimate</b> | <b>Latency<br/>coefficient<br/>estimate</b> | <b>Maximum<br/>absolute<br/>coefficient<br/>estimate</b> |
|-----------------|---------------|------------|-----------------------------------------------|---------------------------------------------|----------------------------------------------------------|
| ENSG00000196565 | HBG2          | 11p15.4    | -0.430562                                     | -0.0447379                                  | 0.430562                                                 |
| ENSG00000174059 | CD34          | 1q32.2     | 0.0035543                                     | 0.38890555                                  | 0.38890555                                               |
| ENSG00000185986 | SDHAP3        | 5p15.33    | 0.3106284                                     | 0.12665469                                  | 0.3106284                                                |
| ENSG00000151208 | DLG5          | 10q22.3    | -0.2074823                                    | -0.0404647                                  | 0.20748232                                               |
| ENSG00000188636 | RTL6          | 22q13.31   | -0.2021669                                    | -0.1119619                                  | 0.20216687                                               |
| ENSG00000124882 | EREG          | 4q13.3     | 0.13331668                                    | 0.16656792                                  | 0.16656792                                               |
| ENSG00000229153 | AS1           | 7q35       | -0.0006369                                    | -0.1442636                                  | 0.14426356                                               |
| ENSG00000072422 | RHOBTB1       | 10q21.2    | -0.1399848                                    | -0.0598644                                  | 0.13998484                                               |
| ENSG00000102409 | BEX4          | Xq22.1     | -0.1391728                                    | -0.0016337                                  | 0.13917276                                               |
| ENSG00000167851 | CD300A        | 17q25.1    | 0.00962377                                    | 0.12963994                                  | 0.12963994                                               |
| ENSG00000166435 | XRR1          | 11q13.4    | -0.0243374                                    | -0.117591                                   | 0.11759102                                               |
| ENSG00000223345 | H2BP1         | 1p11.2     | -0.0207358                                    | -0.0158006                                  | 0.02073575                                               |

## SUPPLEMENTARY TABLES

**Supplementary Table 4.** Demographic, clinical, and gene mutation data in the training (Alliance) and test (AMLCG) sets

| <b>Characteristic*</b>                      | <b>Training set<br/>n=306</b> | <b>Test set<br/>n=40</b> | <b>p-value</b> |
|---------------------------------------------|-------------------------------|--------------------------|----------------|
| Age, years                                  | 46.0 (17 - 59)                | 45.5 (18 - 57)           | 0.598          |
| Sex                                         |                               |                          |                |
| Female                                      | 147 (48.0)                    | 27 (67.5)                | 0.028          |
| Male                                        | 159 (52.0)                    | 13 (32.5)                |                |
| Hemoglobin, g/dL                            | 9.2 (4.8 – 25.1)              | 9.15 (5.1 – 14.0)        | 0.447          |
| Platelet count, x10 <sup>9</sup> /L         | 57 (8 - 445)                  | 61 (10 - 265)            | 0.225          |
| White blood cell count, x10 <sup>9</sup> /L | 28.6 (0.6 - 475)              | 17.6 (1.6 - 156)         | 0.199          |
| Bone marrow blasts, %                       | 68.5 (10 - 96)                | 77.5 (26 - 95)           | 0.021          |
| Blood blasts, %                             | 60.0 (0 - 97)                 | 24.0 (0 - 95)            | <0.001         |
| 2022 ELN genetic group, n (%)               |                               |                          | 0.749          |
| Favorable                                   | 159 (54.5)                    | 19 (48.7)                |                |
| Intermediate                                | 102 (34.9)                    | 16 (41.0)                |                |
| Adverse                                     | 31 (10.6)                     | 4 (10.3)                 |                |
| <i>DNMT3A</i>                               |                               |                          | 1.00           |
| Mutated                                     | 123 (41.3)                    | 16 (40.0)                |                |
| Wild-type                                   | 175 (58.7)                    | 24 (60.0)                |                |
| <i>NRAS</i>                                 |                               |                          | 0.025          |
| Mutated                                     | 45 (15.1)                     | 12 (30.0)                |                |
| Wild-type                                   | 253 (84.9)                    | 28 (70.0)                |                |
| <i>SF3B1</i>                                |                               |                          | 1.00           |
| Mutated                                     | 7 (2.4)                       | 0 (0.0)                  |                |
| Wild-type                                   | 290 (97.6)                    | 40 (100.0)               |                |
| <i>IDH1</i>                                 |                               |                          | 0.399          |
| Mutated                                     | 31 (10.4)                     | 2 (5.0)                  |                |
| Wild-type                                   | 267 (89.6)                    | 38 (95.0)                |                |
| <i>CEBPA</i> <sup>bZIP</sup>                |                               |                          | 0.266          |
| Mutated                                     | 55 (18.5)                     | 4 (10.0)                 |                |
| Wild-type                                   | 243 (81.5)                    | 36 (90.0)                |                |
| <i>GATA2</i>                                |                               |                          | 0.774          |
| Mutated                                     | 27 (9.1)                      | 4 (10.0)                 |                |
| Wild-type                                   | 271 (90.9)                    | 36 (90.0)                |                |
| <i>TET2</i>                                 |                               |                          | 0.278          |
| Mutated                                     | 29 (9.7)                      | 6 (15.0)                 |                |
| Wild-type                                   | 269 (90.3)                    | 34 (85.0)                |                |
| <i>NPM1</i>                                 |                               |                          | 1.00           |



## SUPPLEMENTARY TABLES

| Characteristic* | Training set<br>n=306 | Test set<br>n=40 | p-value |
|-----------------|-----------------------|------------------|---------|
| Mutated         | 192 (64.4)            | 26 (65.0)        |         |
| Wild-type       | 106 (35.6)            | 14 (35.0)        |         |
| <i>WT1</i>      |                       |                  | <0.001  |
| Mutated         | 19 (6.4)              | 12 (30.0)        |         |
| Wild-type       | 279 (93.6)            | 28 (70.0)        |         |
| <i>PTPN11</i>   |                       |                  | 1.00    |
| Mutated         | 31 (10.4)             | 4 (10.0)         |         |
| Wild-type       | 267 (89.6)            | 36 (90.0)        |         |
| <i>FLT3-TKD</i> |                       |                  | 0.069   |
| Present         | 33 (11.1)             | 9 (22.5)         |         |
| Absent          | 264 (88.9)            | 31 (77.5)        |         |
| <i>FLT3-ITD</i> |                       |                  | 0.724   |
| Present         | 103 (34.1)            | 15 (37.5)        |         |
| Absent          | 199 (65.9)            | 25 (62.5)        |         |
| <i>IDH2</i>     |                       |                  | 1.00    |
| Mutated         | 31 (10.4)             | 4 (10.0)         |         |
| Wild-type       | 267 (89.6)            | 36 (90.0)        |         |
| <i>MLL-PTD</i>  |                       |                  | 0.272   |
| Present         | 6 (5.2)               | 4 (10.3)         |         |
| Absent          | 110 (94.8)            | 35 (89.7)        |         |
| <i>TP53</i>     |                       |                  | 1.00    |
| Mutated         | 1 (0.3)               | 0 (0.0)          |         |
| Wild-type       | 297 (99.7)            | 40 (100.0)       |         |
| <i>SRSF2</i>    |                       |                  | 1.00    |
| Mutated         | 10 (3.4)              | 1 (2.5)          |         |
| Wild-type       | 286 (96.6)            | 39 (97.5)        |         |
| <i>ASXL1</i>    |                       |                  | 0.378   |
| Mutated         | 13 (4.4)              | 0 (0.0)          |         |
| Wild-type       | 285 (95.6)            | 40 (100.0)       |         |
| <i>RUNX1</i>    |                       |                  | 0.437   |
| Mutated         | 14 (4.7)              | 3 (7.5)          |         |
| Wild-type       | 284 (95.3)            | 37 (92.5)        |         |
| <i>BCOR</i>     |                       |                  | 0.336   |
| Mutated         | 8 (2.7)               | 2 (5.0)          |         |
| Wild-type       | 290 (97.3)            | 38 (95.0)        |         |

ELN, European LeukemiaNet.

\* Continuous variables were summarized by reporting the median (range) while categorical variables were summarized by reporting frequency (percentage).

## SUPPLEMENTARY TABLES

**Supplementary Table 5.** Demographic, clinical, and gene mutation data in the training set categorized by the penalized mixture cure model as cured or susceptible with low risk or high risk

| <b>Characteristic*</b>                      | <b>Cured<br/>n=95</b> | <b>Low risk<br/>n=86</b> | <b>High risk<br/>n=125</b> | <b>p-value</b> |
|---------------------------------------------|-----------------------|--------------------------|----------------------------|----------------|
| Age, years                                  | 45 (18 - 59)          | 44 (19 - 59)             | 47 (17 - 59)               | 0.681          |
| Sex                                         |                       |                          |                            |                |
| Female                                      | 45 ( 47.4)            | 40 ( 46.5)               | 62 ( 49.6)                 | 0.906          |
| Male                                        | 50 ( 52.6)            | 46 ( 53.5)               | 63 ( 50.4)                 |                |
| Hemoglobin, g/dL                            | 9.4 (4.9 – 25.1)      | 9.35 (4.9 – 13.6)        | 9.1 (4.8 – 13.7)           | 0.207          |
| Platelet count, x10 <sup>9</sup> /L         | 55.0 (8 - 445)        | 64.5 (9 - 433)           | 56.0 (13 - 266)            | 0.262          |
| White blood cell count, x10 <sup>9</sup> /L | 24.9 (1.9 - 475)      | 22.5 (0.6 – 295.0)       | 34.4 (1.0 – 308.8)         | 0.02           |
| Bone marrow blasts, %                       | 64 (10 - 93)          | 68.5 (20 - 95)           | 70 (18 - 96)               | 0.018          |
| Blood blasts, %                             | 55 (0 - 95)           | 60.5 (0 - 97)            | 65 (0 - 97)                | 0.087          |
| 2022 ELN genetic group, n (%)               |                       |                          |                            | <0.001         |
| Favorable                                   | 73 (80.2)             | 47 (56.0)                | 39 (33.3)                  |                |
| Intermediate                                | 16 (17.6)             | 24 (28.6)                | 62 (53.0)                  |                |
| Adverse                                     | 2 (2.2)               | 13 (15.5)                | 16 (13.7)                  |                |
| <i>DNMT3A</i>                               |                       |                          |                            | <0.001         |
| Mutated                                     | 33 (35.1)             | 24 (28.2)                | 66 (55.5)                  |                |
| Wild-type                                   | 61 (64.9)             | 61 (71.8)                | 53 (44.5)                  |                |
| <i>NRAS</i>                                 |                       |                          |                            | 0.446          |
| Mutated                                     | 18 (19.1)             | 11 (12.9)                | 16 (13.4)                  |                |
| Wild-type                                   | 76 (80.9)             | 74 (87.1)                | 103 (86.6)                 |                |
| <i>SF3B1</i>                                |                       |                          |                            | 0.119          |
| Mutated                                     | 0 (0.0)               | 2 (2.4)                  | 5 (4.2)                    |                |
| Wild-type                                   | 94 (100.0)            | 82 (97.6)                | 114 (95.8)                 |                |
| <i>IDH1</i>                                 |                       |                          |                            | 0.503          |
| Mutated                                     | 7 (7.4)               | 9 (10.6)                 | 15 (12.6)                  |                |
| Wild-type                                   | 87 (92.6)             | 76 (89.4)                | 104 (87.4)                 |                |
| <i>CEBPA</i> <sup>bZIP</sup>                |                       |                          |                            | 0.035          |
| Mutated                                     | 25 (26.6)             | 15 (17.6)                | 15 (12.6)                  |                |
| Wild-type                                   | 69 (73.4)             | 70 (82.4)                | 104 (87.4)                 |                |
| <i>GATA2</i>                                |                       |                          |                            | 0.169          |
| Mutated                                     | 13 (13.8)             | 6 (7.1)                  | 8 (6.7)                    |                |
| Wild-type                                   | 81 (86.2)             | 79 (92.9)                | 111 (93.3)                 |                |
| <i>TET2</i>                                 |                       |                          |                            | 0.532          |
| Mutated                                     | 10 (10.6)             | 10 (11.8)                | 9 (7.6)                    |                |
| Wild-type                                   | 84 (89.4)             | 75 (88.2)                | 110 (92.4)                 |                |

**SUPPLEMENTARY TABLES**

| <b>Characteristic*</b> | <b>Cured<br/>n=95</b> | <b>Low risk<br/>n=86</b> | <b>High risk<br/>n=125</b> | <b>p-value</b> |
|------------------------|-----------------------|--------------------------|----------------------------|----------------|
| <i>NPM1</i>            |                       |                          |                            | 0.372          |
| Mutated                | 66 (70.2)             | 53 (62.4)                | 73 (61.3)                  |                |
| Wild-type              | 28 (29.8)             | 32 (37.6)                | 46 (38.7)                  |                |
| <i>WT1</i>             |                       |                          |                            | 0.096          |
| Mutated                | 2 (2.1)               | 7 (8.2)                  | 10 (8.4)                   |                |
| Wild-type              | 92 (97.9)             | 78 (91.8)                | 109 (91.6)                 |                |
| <i>PTPN11</i>          |                       |                          |                            | 0.073          |
| Mutated                | 14 (14.9)             | 10 (11.8)                | 7 (5.9)                    |                |
| Wild-type              | 80 (85.1)             | 75 (88.2)                | 112 (94.1)                 |                |
| <i>FLT3-TKD</i>        |                       |                          |                            | 0.005          |
| Present                | 18 (19.4)             | 9 (10.6)                 | 6 (5.0)                    |                |
| Absent                 | 75 (80.6)             | 76 (89.4)                | 113 (95.0)                 |                |
| <i>FLT3-ITD</i>        |                       |                          |                            | <0.001         |
| Present                | 15 (15.8)             | 22 (26.2)                | 66 (53.7)                  |                |
| Absent                 | 80 (84.2)             | 62 (73.8)                | 57 (46.3)                  |                |
| <i>IDH2</i>            |                       |                          |                            | 0.121          |
| Mutated                | 7 (7.4)               | 14 (16.5)                | 10 (8.4)                   |                |
| Wild-type              | 87 (92.6)             | 71 (83.5)                | 109 (91.6)                 |                |
| <i>MLL-PTD</i>         |                       |                          |                            | 0.772          |
| Present                | 3 (7.7)               | 1 (2.9)                  | 2 (4.8)                    |                |
| Absent                 | 36 (92.3)             | 34 (97.1)                | 40 (95.2)                  |                |
| <i>TP53</i>            |                       |                          |                            | 0.601          |
| Mutated                | 1 (1.1)               | 0 (0.0)                  | 0 (0.0)                    |                |
| Wild-type              | 93 (98.9)             | 85 (100.0)               | 119 (100.0)                |                |
| <i>SRSF2</i>           |                       |                          |                            | 0.282          |
| Mutated                | 1 (1.1)               | 4 (4.8)                  | 5 (4.2)                    |                |
| Wild-type              | 92 (98.9)             | 80 (95.2)                | 114 (95.8)                 |                |
| <i>ASXL1</i>           |                       |                          |                            | 0.937          |
| Mutated                | 4 (4.3)               | 3 (3.5)                  | 6 (5.0)                    |                |
| Wild-type              | 90 (95.7)             | 82 (96.5)                | 113 (95.0)                 |                |
| <i>RUNX1</i>           |                       |                          |                            | 0.036          |
| Mutated                | 1 (1.1)               | 3 (3.5)                  | 10 (8.4)                   |                |
| Wild-type              | 93 (98.9)             | 82 (96.5)                | 109 (91.6)                 |                |
| <i>BCOR</i>            |                       |                          |                            | 0.353          |
| Mutated                | 1 (1.1)               | 2 (2.4)                  | 5 (4.2)                    |                |
| Wild-type              | 93 (98.9)             | 83 (97.6)                | 114 (95.8)                 |                |
| Number of mutations    | 2 (0, 5)              | 2.5 (0, 4)               | 3.5 (0, 5)                 | 0.196          |

ELN, European LeukemiaNet.

## **SUPPLEMENTARY TABLES**

\* Continuous variables were summarized by reporting median (range) while categorical variables were summarized by reporting frequency (percentage).

## SUPPLEMENTARY TABLES

**Supplementary Table 6.** Demographic, clinical, and gene mutation data in the test set categorized by the penalized mixture cure model as cured or susceptible with low risk or high risk

| Characteristic*                             | Cured<br>n=8      | Low risk<br>n=16   | High risk<br>n=16 | p-value |
|---------------------------------------------|-------------------|--------------------|-------------------|---------|
| Age, years                                  | 43.5 (18 - 54)    | 45.5 (25 - 56)     | 47.5 (19 - 57)    | 0.818   |
| Sex                                         |                   |                    |                   | 0.516   |
| Female                                      | 4 (50.0)          | 11 (68.8)          | 12 (75.0)         |         |
| Male                                        | 4 (50.0)          | 5 (31.2)           | 4 (25.0)          |         |
| Hemoglobin, g/dL                            | 9.8 (5.1 – 13.8)  | 9.25 (5.1 – 11.2)  | 8.4 (6.8 – 14.0)  | 0.716   |
| Platelet count, x10 <sup>9</sup> /L         | 47.5 (13 - 265)   | 63 (10 – 128)      | 55 (18 - 238)     | 0.816   |
| White blood cell count, x10 <sup>9</sup> /L | 13.9 (6.4 – 50.9) | 12.9 (1.6 – 146.4) | 20.9 (2.96 - 156) | 0.436   |
| Bone marrow blasts, %                       | 90 (35 - 95)      | 86 (30 - 93)       | 74 (26 -95)       | 0.835   |
| Blood blasts, %                             | 1 (0 - 94)        | 25 (0 - 95)        | 34 (0 - 80)       | 0.232   |
| 2022 ELN genetic group, n (%)               |                   |                    |                   | 0.637   |
| Favorable                                   | 6 (75.0)          | 7 (43.8)           | 6 (40.0)          |         |
| Intermediate                                | 2 (25.0)          | 7 (43.8)           | 7 (46.7)          |         |
| Adverse                                     | 0 (0.0)           | 2 (12.5)           | 2 (13.3)          |         |
| <i>DNMT3A</i>                               |                   |                    |                   | 0.496   |
| Mutated                                     | 2 (25.0)          | 6 (37.5)           | 8 (50.0)          |         |
| Wild-type                                   | 6 (75.0)          | 10 (62.5)          | 8 (50.0)          |         |
| <i>NRAS</i>                                 |                   |                    |                   | 0.155   |
| Mutated                                     | 4 (50.0)          | 2 (12.5)           | 6 (37.5)          |         |
| Wild-type                                   | 4 (50.0)          | 14 (87.5)          | 10 (62.5)         |         |
| <i>SF3B1</i>                                |                   |                    |                   | NA      |
| Mutated                                     | 0 (0.0)           | 0 (0.0)            | 0 (0.0)           |         |
| Wild-type                                   | 8 (100.0)         | 16 (100.0)         | 16 (100.0)        |         |
| <i>IDH1</i>                                 |                   |                    |                   | 0.672   |
| Mutated                                     | 1 (12.5)          | 1 (6.2)            | 0 (0.0)           |         |
| Wild-type                                   | 7 (87.5)          | 15 (93.8)          | 16 (100.0)        |         |
| <i>CEBPA</i> <sup>bZIP</sup>                |                   |                    |                   | 0.020   |
| Mutated                                     | 3 (37.5)          | 0 (0.0)            | 1 (6.2)           |         |
| Wild-type                                   | 5 (62.5)          | 16 (100.0)         | 15 (93.8)         |         |
| <i>GATA2</i>                                |                   |                    |                   | 0.02    |
| Mutated                                     | 3 (37.5)          | 0 (0.0)            | 1 (6.2)           |         |
| Wild-type                                   | 5 (62.5)          | 16 (100.0)         | 15 (93.8)         |         |
| <i>TET2</i>                                 |                   |                    |                   | 0.167   |
| Mutated                                     | 3 (37.5)          | 1 (6.2)            | 2 (12.5)          |         |
| Wild-type                                   | 5 (62.5)          | 15 (93.8)          | 14 (87.5)         |         |
| <i>NPM1</i>                                 |                   |                    |                   | 0.576   |

**SUPPLEMENTARY TABLES**

| <b>Characteristic*</b> | <b>Cured<br/>n=8</b> | <b>Low risk<br/>n=16</b> | <b>High risk<br/>n=16</b> | <b>p-value</b> |
|------------------------|----------------------|--------------------------|---------------------------|----------------|
| Mutated                | 5 (62.5)             | 12 (75.0)                | 9 (56.2)                  |                |
| Wild-type              | 3 (37.5)             | 4 (25.0)                 | 7 (43.8)                  |                |
| <i>WT1</i>             |                      |                          |                           | 0.017          |
| Mutated                | 1 (12.5)             | 2 (12.5)                 | 9 (56.2)                  |                |
| Wild-type              | 7 (87.5)             | 14 (87.5)                | 7 (43.8)                  |                |
| <i>PTPN11</i>          |                      |                          |                           | 1.00           |
| Mutated                | 1 (12.5)             | 2 (12.5)                 | 1 (6.2)                   |                |
| Wild-type              | 7 (87.5)             | 14 (87.5)                | 15 (93.8)                 |                |
| <i>FLT3 TKD</i>        |                      |                          |                           | 0.791          |
| Present                | 1 (12.5)             | 4 (25.0)                 | 4 (25.0)                  |                |
| Absent                 | 7 (87.5)             | 12 (75.0)                | 12 (75.0)                 |                |
| <i>FLT3 ITD</i>        |                      |                          |                           | 0.522          |
| Present                | 2 (25.0)             | 5 (31.2)                 | 8 (50.0)                  |                |
| Absent                 | 6 (75.0)             | 11 (68.8)                | 8 (50.0)                  |                |
| <i>IDH2</i>            |                      |                          |                           | 0.506          |
| Mutated                | 0 (0.0)              | 3 (18.8)                 | 1 (6.2)                   |                |
| Wild-type              | 8 (100.0)            | 13 (81.2)                | 15 (93.8)                 |                |
| <i>MLL-PTD</i>         |                      |                          |                           | 0.406          |
| Present                | 0 (0.0)              | 1 (6.2)                  | 3 (20.0)                  |                |
| Absent                 | 8 (100.0)            | 15 (93.8)                | 12 (80.0)                 |                |
| <i>TP53</i>            |                      |                          |                           | NA             |
| Mutated                | 0 (0.0)              | 0 (0.0)                  | 0 (0.0)                   |                |
| Wild-type              | 8 (100.0)            | 16 (100.0)               | 16 (100.0)                |                |
| <i>SRSF2</i>           |                      |                          |                           | 1.00           |
| Mutated                | 0 (0.0)              | 1 (6.2)                  | 0 (0.0)                   |                |
| Wild-type              | 8 (100.0)            | 15 (93.8)                | 16 (100.0)                |                |
| <i>ASXL1</i>           |                      |                          |                           | NA             |
| Mutated                | 0 (0.0)              | 0 (0.0)                  | 0 (0.0)                   |                |
| Wild-type              | 8 (100.0)            | 16 (100.0)               | 16 (100.0)                |                |
| <i>RUNX1</i>           |                      |                          |                           | 0.793          |
| Mutated                | 0 (0.0)              | 1 (6.2)                  | 2 (12.5)                  |                |
| Wild-type              | 8 (100.0)            | 15 (93.8)                | 14 (87.5)                 |                |
| <i>BCOR</i>            |                      |                          |                           | 0.344          |
| Mutated                | 0 (0.0)              | 0 (0.0)                  | 2 (12.5)                  |                |
| Wild-type              | 8 (100.0)            | 16 (100.0)               | 14 (87.5)                 |                |
| Number of mutations    | 3 (1, 5)             | 3 (0, 4)                 | 3.5 (1, 7)                | 0.199          |

\* Continuous variables were summarized by reporting median (range) while categorical variables were summarized by reporting frequency (percentage).
